# Supplementary material for: The Detection of Metabolite-Mediated Gene Module Co-Expression Using Multivariate Linear Models
Source: PubMed Central journal article supplement (PMC4769021; doi:10.1371/journal.pone.0150257), 2016-02-26
Supplement: pone.0150257.s001.pdf [file pone.0150257.s001.pdf]

## Supplementary Material

An example of the design matrix,  $X_{si}$ , for the  $i$ -th individual in the  $s$ -th subset (see Equation 2 of Section 3.3) is provided below. This representation is based on a model including the covariates: gene, metabolic concentration, age, gender and the two-way interaction between gene and metabolic concentrations.

$$X_{si} = \begin{array}{c} \begin{array}{cccccccccccc} \mu & g_1 & g_2 & \cdots & g_{G-1} & conc. & age & gender & g_1 * conc. & g_2 * conc. & \cdots & g_{G-1} * conc. \end{array} \\ \left[ \begin{array}{cccccccccccc} 1 & 1 & 0 & \cdots & 0 & 0.3 & 30 & 1 & 0.3 & 0 & \cdots & 0 \\ 1 & 0 & 1 & \cdots & 0 & 0.3 & 30 & 1 & 0 & 0.3 & \cdots & 0 \\ \vdots & \vdots \\ 1 & 0 & 0 & \cdots & 1 & 0.3 & 30 & 1 & 0 & 0 & \cdots & 0.3 \\ 1 & 0 & 0 & \cdots & 0 & 0.3 & 30 & 1 & 0 & 0 & \cdots & 0 \end{array} \right] \end{array}$$
