# Supplementary material for: The Detection of Metabolite-Mediated Gene Module Co-Expression Using Multivariate Linear Models
Source: PubMed Central journal article supplement (PMC4769021; doi:10.1371/journal.pone.0150257), 2016-02-26
Supplement: pone.0150257.s003.pdf [file pone.0150257.s003.pdf]

# Supplementary Table 1

Table 1: Type I error probabilities for the GLM-based test statistics by module size and sample size

| module size | sample size ( $n$ ) | GLM-based LR test*     | GLM-based Larntz & Perlman* | GLM-based Jennrich*    | GLM-based Cole*        |
|-------------|---------------------|------------------------|-----------------------------|------------------------|------------------------|
| module size | sample size         | LRT type I error       | Larntz type I error         | Jennrich type I error  | Cole type I error      |
| 4           | 125                 | 0.109 [0.089, 0.129]   | 0.045 [0.032, 0.058]        | 0.091 [0.073, 0.109]   | 0.198 [0.173, 0.223]   |
| 4           | 450                 | 0.062 [0.047, 0.077]   | 0.043 [0.030, 0.056]        | 0.065 [0.049, 0.081]   | 0.082 [0.064, 0.100]   |
| 4           | 800                 | 0.053 [0.039, 0.067]   | 0.035 [0.023, 0.047]        | 0.050 [0.036, 0.064]   | 0.063 [0.047, 0.079]   |
| 5           | 125                 | 0.141 [0.119, 0.163]   | 0.048 [0.034, 0.062]        | 0.091 [0.073, 0.109]   | 0.288 [0.259, 0.317]   |
| 5           | 450                 | 0.067 [0.051, 0.083]   | 0.037 [0.025, 0.049]        | 0.055 [0.040, 0.070]   | 0.088 [0.070, 0.106]   |
| 5           | 800                 | 0.066 [0.050, 0.082]   | 0.048 [0.034, 0.062]        | 0.054 [0.039, 0.069]   | 0.073 [0.056, 0.090]   |
| 7           | 125                 | 0.314 [0.285, 0.343]   | 0.035 [0.023, 0.047]        | 0.104 [0.085, 0.123]   | 0.572 [0.541, 0.603]   |
| 7           | 450                 | 0.083* [0.065, 0.100]  | 0.036* [0.024, 0.048]       | 0.068* [0.051, 0.084]  | 0.089* [0.071, 0.107]  |
| 7           | 800                 | 0.070** [0.054, 0.087] | 0.029** [0.018, 0.040]      | 0.058** [0.043, 0.073] | 0.080** [0.062, 0.097] |

\* estimate [95% confidence interval]

\* convergence rate of GLM: 0.991

\*\* convergence rate of GLM: 0.993
