# Supplementary material for: The Detection of Metabolite-Mediated Gene Module Co-Expression Using Multivariate Linear Models
Source: PubMed Central journal article supplement (PMC4769021; doi:10.1371/journal.pone.0150257), 2016-02-26
Supplement: pone.0150257.s004.pdf [file pone.0150257.s004.pdf]

## Supplementary Table 2

Table 2: Power of the GLM-based test statistics for different co-expression dynamics and sample sizes

| co-expression dynamics              | sample size ( $n$ ) | GLM-based LR test*   | GLM-based Larntz & Perlman* | GLM-based Jennrich*  | GLM-based Cole*      |
|-------------------------------------|---------------------|----------------------|-----------------------------|----------------------|----------------------|
| approx. linear positive association | 125                 | 0.314 [0.285, 0.343] | 0.188 [0.163, 0.213]        | 0.239 [0.212, 0.266] | 0.374 [0.344, 0.404] |
| approx. linear positive association | 450                 | 0.826 [0.802, 0.850] | 0.797 [0.772, 0.822]        | 0.711 [0.682, 0.740] | 0.690 [0.661, 0.719] |
| approx. linear positive association | 800                 | 0.990 [0.983, 0.997] | 0.989 [0.982, 0.996]        | 0.962 [0.950, 0.974] | 0.953 [0.939, 0.967] |
| approx. linear negative association | 125                 | 0.300 [0.271, 0.329] | 0.184 [0.159, 0.209]        | 0.228 [0.201, 0.255] | 0.358 [0.328, 0.388] |
| approx. linear negative association | 450                 | 0.838 [0.815, 0.861] | 0.819 [0.795, 0.843]        | 0.716 [0.688, 0.744] | 0.693 [0.664, 0.722] |
| approx. linear negative association | 800                 | 0.988 [0.981, 0.995] | 0.987 [0.979, 0.995]        | 0.960 [0.947, 0.973] | 0.949 [0.935, 0.963] |
| non-linear association              | 125                 | 0.293 [0.264, 0.322] | 0.243 [0.216, 0.270]        | 0.240 [0.213, 0.267] | 0.457 [0.426, 0.488] |
| non-linear association              | 450                 | 0.759 [0.732, 0.786] | 0.856 [0.834, 0.878]        | 0.744 [0.716, 0.772] | 0.748 [0.721, 0.775] |
| non-linear association              | 800                 | 0.969 [0.958, 0.980] | 0.993 [0.987, 0.999]        | 0.963 [0.951, 0.975] | 0.960 [0.947, 0.973] |
| non-linear association              | 125                 | 0.348 [0.318, 0.378] | 0.193 [0.168, 0.218]        | 0.228 [0.201, 0.255] | 0.371 [0.341, 0.401] |
| non-linear association              | 450                 | 0.863 [0.841, 0.885] | 0.841 [0.818, 0.864]        | 0.693 [0.664, 0.722] | 0.648 [0.618, 0.678] |
| non-linear association              | 800                 | 0.992 [0.986, 0.998] | 0.990 [0.983, 0.997]        | 0.956 [0.943, 0.969] | 0.943 [0.928, 0.958] |
| weak positive association           | 125                 | 0.143 [0.121, 0.165] | 0.072 [0.055, 0.089]        | 0.131 [0.110, 0.152] | 0.267 [0.239, 0.295] |
| weak positive association           | 450                 | 0.182 [0.158, 0.206] | 0.183 [0.159, 0.207]        | 0.192 [0.167, 0.217] | 0.205 [0.179, 0.231] |
| weak positive association           | 800                 | 0.316 [0.287, 0.345] | 0.351 [0.321, 0.381]        | 0.342 [0.312, 0.372] | 0.340 [0.310, 0.370] |

Data simulated for a four-gene module.

\* estimate [95% confidence interval]
